# Supplementary material for: The atypical RNA-binding protein TAF15 regulates dorsoanterior neural development through diverse mechanisms in Xenopus tropicalis
Source: bioRxiv or medRxiv preprint supplement (doi:10.1101/2021.06.14.041913), 2021-06-14
Supplement: Supplementary file [file media-4.pdf]

DeJong et al. Supplemental Table 3. Stage-persistent Differential Exon Usage, Stage 10 and 15

| Gene         | Condition UP | Retained intron as visualized by DEXseq gene modeling | Increased levels of intron detected as visualized by DEXseq gene modeling | Maternally deposited? | > 2 Fold increase? | # of genes |
|--------------|--------------|-------------------------------------------------------|---------------------------------------------------------------------------|-----------------------|--------------------|------------|
| actr3        | MO           |                                                       | x                                                                         | yes                   | yes                |            |
| aldoa        | MO           |                                                       | x                                                                         | yes                   | yes                |            |
| alms1        | MO           |                                                       | x                                                                         | yes                   | yes                |            |
| arhgap12     | MO           |                                                       | x                                                                         | yes                   | yes                |            |
| arrdc2       | MO           | x                                                     |                                                                           | yes                   | yes                |            |
| asxl1        | MO           |                                                       | x                                                                         | yes                   | yes                |            |
| bmp7.1       | MO           | x                                                     |                                                                           | yes                   | yes                |            |
| c11orf2      | MO           | x                                                     |                                                                           | yes                   | yes                |            |
| c16orf72     | MO           |                                                       | x                                                                         | yes                   | yes                |            |
| c1orf112     | MO           | x                                                     |                                                                           | yes                   | yes                |            |
| caprin1      | MO           |                                                       | x                                                                         | yes                   | yes                |            |
| cdc6         | MO           |                                                       | x                                                                         | yes                   | yes                |            |
| cdk12        | MO           |                                                       | x                                                                         | yes                   | yes                |            |
| cecr2        | MO           |                                                       | x                                                                         | yes                   | yes                |            |
| cepl35       | MO           |                                                       | x                                                                         | yes                   | yes                |            |
| chmp5        | MO           | x                                                     |                                                                           | yes                   | yes                |            |
| clp1         | MO           | x                                                     |                                                                           | yes                   | yes                |            |
| ctdsp2       | MO           |                                                       | x                                                                         | yes                   | yes                |            |
| dennd2a      | MO           | x                                                     |                                                                           | yes                   | yes                |            |
| dgka         | MO           | x                                                     |                                                                           | yes                   | yes                |            |
| dido1        | MO           | x                                                     |                                                                           | yes                   | yes                |            |
| dnajc5g      | MO           |                                                       | x                                                                         | yes                   | yes                |            |
| dus4l        | MO           |                                                       | x                                                                         | yes                   | yes                |            |
| eed          | MO           |                                                       | x                                                                         | yes                   | yes                |            |
| EIF2S2       | MO           |                                                       | x                                                                         | yes                   | yes                |            |
| ets1         | MO           |                                                       | x                                                                         | yes                   | yes                |            |
| ets2         | MO           |                                                       | x                                                                         | yes                   | yes                |            |
| exosc2       | MO           |                                                       | x                                                                         | yes                   | yes                |            |
| extl3        | MO           |                                                       | x                                                                         | yes                   | yes                |            |
| farsa        | MO           |                                                       | x                                                                         | yes                   | yes                |            |
| <b>fgfr4</b> | <b>MO</b>    | <b>x</b>                                              |                                                                           | <b>yes</b>            | <b>yes</b>         |            |
| fmnl3        | MO           |                                                       | x                                                                         | yes                   | yes                |            |
| gps2         | MO           | x                                                     |                                                                           | yes                   | yes                |            |
| gtf2h4       | MO           |                                                       | x                                                                         | yes                   | yes                |            |
| herpud1      | MO           | x                                                     |                                                                           | yes                   | yes                |            |
| hexdc        | MO           | x                                                     |                                                                           | yes                   | yes                |            |
| hras         | MO           |                                                       | x                                                                         | yes                   | yes                |            |
| ifrd2        | MO           |                                                       | x                                                                         | yes                   | yes                |            |
| ing4         | MO           | x                                                     |                                                                           | yes                   | yes                |            |
| ints6        | MO           |                                                       | x                                                                         | yes                   | yes                |            |
| irf6.2       | MO           |                                                       | x                                                                         | yes                   | yes                |            |
| jag1         | MO           |                                                       | x                                                                         | yes                   | yes                |            |
| kiaa0664     | MO           | x                                                     |                                                                           | yes                   | yes                |            |
| klf2         | MO           |                                                       | x                                                                         | yes                   | yes                |            |
| khdhc3       | MO           |                                                       | x                                                                         | yes                   | yes                |            |
| lemd3        | MO           |                                                       | x                                                                         | yes                   | yes                |            |
| frig3        | MO           |                                                       | x                                                                         | yes                   | yes                |            |
| mcm3ap       | MO           |                                                       | x                                                                         | yes                   | yes                |            |
| myd88        | MO           |                                                       | x                                                                         | yes                   | yes                |            |
| myo1e.2      | MO           |                                                       | x                                                                         | yes                   | yes                |            |
| neo1         | MO           | x                                                     |                                                                           | yes                   | yes                |            |
| nme2         | MO           |                                                       | x                                                                         | yes                   | yes                |            |
| npdc1.1      | MO           |                                                       | x                                                                         | yes                   | yes                |            |
| nxf1         | MO           |                                                       | x                                                                         | yes                   | yes                |            |
| pan3         | MO           | x                                                     |                                                                           | yes                   | yes                |            |
| parp1        | MO           |                                                       | x                                                                         | yes                   | yes                |            |
| pask         | MO           |                                                       | x                                                                         | yes                   | yes                |            |
| paxip1       | MO           |                                                       | x                                                                         | yes                   | yes                |            |
| pdgfa        | MO           | x                                                     |                                                                           | yes                   | yes                |            |
| per2         | MO           | x                                                     |                                                                           | yes                   | yes                |            |
| per3         | MO           |                                                       | x                                                                         | yes                   | yes                |            |
| pggt1b       | MO           |                                                       | x                                                                         | yes                   | yes                |            |
| phf8         | MO           |                                                       | x                                                                         | yes                   | yes                |            |
| pip5k1a      | MO           |                                                       | x                                                                         | yes                   | yes                |            |
| plekhg5      | MO           |                                                       | x                                                                         | yes                   | yes                |            |
| poldip3      | MO           |                                                       | x                                                                         | yes                   | yes                |            |
| polr2c       | MO           |                                                       | x                                                                         | yes                   | yes                |            |
| prcp         | MO           |                                                       | x                                                                         | yes                   | yes                |            |
| prpf39.1     | MO           |                                                       | x                                                                         | yes                   | yes                |            |
| prpf6        | MO           |                                                       | x                                                                         | yes                   | yes                |            |
| prr5l        | MO           |                                                       | x                                                                         | yes                   | yes                |            |
| puf60        | MO           |                                                       | x                                                                         | yes                   | yes                |            |
| pus7         | MO           |                                                       | x                                                                         | yes                   | yes                |            |
| pygm         | MO           |                                                       | x                                                                         | yes                   | yes                |            |
| rab15        | MO           | x                                                     |                                                                           | yes                   | yes                |            |
| rpf2:E002    | MO           |                                                       | x                                                                         | yes                   | yes                |            |
| rpl28        | MO           |                                                       | x                                                                         | yes                   | yes                |            |
| senp7        | MO           | x                                                     |                                                                           | yes                   | yes                |            |
| smpd1        | MO           |                                                       | x                                                                         | yes                   | yes                |            |
| spint2       | MO           |                                                       | x                                                                         | yes                   | yes                |            |
| srsf4        | MO           | x                                                     |                                                                           | yes                   | yes                |            |
| stam2        | MO           |                                                       | x                                                                         | yes                   | yes                |            |
| stoml2       | MO           |                                                       | x                                                                         | yes                   | yes                |            |
| tada1        | MO           | x                                                     |                                                                           | yes                   | yes                |            |
| tfap4        | MO           |                                                       | x                                                                         | yes                   | yes                |            |
| topbp1       | MO           |                                                       | x                                                                         | yes                   | yes                |            |
| trpc4ap      | MO           |                                                       | x                                                                         | yes                   | yes                |            |
| ubap2        | MO           |                                                       | x                                                                         | yes                   | yes                |            |
| xnf7         | MO           |                                                       | x                                                                         | yes                   | yes                |            |
| xpo5         | MO           |                                                       | x                                                                         | yes                   | yes                |            |
| zdhhc5       | MO           | x                                                     |                                                                           | yes                   | yes                |            |
| znrf3        | MO           |                                                       | x                                                                         | yes                   | yes                | 92         |
| Fam122b      | MO           | x                                                     |                                                                           | no                    | yes                |            |
| frem3        | MO           |                                                       | x                                                                         | no                    | yes                |            |
| gpr110       | MO           | x                                                     |                                                                           | no                    | yes                |            |
| inx2         | MO           | x                                                     |                                                                           | no                    | yes                |            |
| isl1         | MO           | x                                                     |                                                                           | no                    | yes                |            |
| pdcd7        | MO           |                                                       | x                                                                         | no                    | yes                |            |
| phox2a       | MO           |                                                       | x                                                                         | no                    | yes                |            |
| slc5a8       | MO           | x                                                     |                                                                           | no                    | yes                | 8          |

Gene Condition UP Retained intron as visualized by DEXseq DEU model Increased levels of intron detected as visualized by DEXseq DEU model Maternally deposited? > 2 Fold increase? # of genes

DeJong et al. Supplemental Table 3. Stage-persistent Differential Exon Usage, Stage 10 and 15
