# Supplementary material for: The atypical RNA-binding protein TAF15 regulates dorsoanterior neural development through diverse mechanisms in Xenopus tropicalis
Source: bioRxiv or medRxiv preprint supplement (doi:10.1101/2021.06.14.041913), 2021-06-14
Supplement: Supplementary file [file media-8.pdf]

## DeJong et al. Supplemental Table 7. Differential Exon Usage Characteristics

### Stage 10: top 10 named genes as sorted by adjusted P-value

| Gene   | Number if retained introns | Which intron(s) retained? |
|--------|----------------------------|---------------------------|
| fgfr4  | 1                          | 1st                       |
| ets2   | 2                          | 3rd and 4th               |
| tfap4  | 1                          | 3rd                       |
| pygm   | 3                          | Throughout 19th           |
| eif2s2 | 1                          | 7th                       |
| gcfc1  | 1                          | 6th                       |
| irx2   | 4                          | Throughout 1st and 3rd    |
| dgka   | 2                          | 16th and 17th             |
| asxl1  | 1                          | 7th                       |
| prpf6  | 1                          | 16th                      |

### Stage 15: top 10 named genes as sorted by adjusted P-value

| Gene   | Number if retained introns | Which intron(s) retained?   |
|--------|----------------------------|-----------------------------|
| ctdsp2 | 22                         | throughout whole transcript |
| pax8   | 1                          | 5th                         |
| fgfr4  | 1                          | 1st                         |
| masp1  | 1                          | 4th                         |
| c5     | 1                          | 12th                        |
| mapre2 | 1                          | 3rd                         |
| vsig8  | 1                          | 1st                         |
| mcm3ap | 2                          | Throughout the 23rd         |
| per2   | 2                          | 1st and 2nd                 |
| gpr110 | 1                          | 9th                         |
